# Supplementary material
Source: PubMed Central journal article supplement (PMC2639678)
Supplement: 97320630003072S1.pdf [file 97320630003072S1.pdf]

| Supplementary material            |           |                           |                                      |                              |                             |                                   |                              |    |
|-----------------------------------|-----------|---------------------------|--------------------------------------|------------------------------|-----------------------------|-----------------------------------|------------------------------|----|
| MHC Class I allele/peptide length | PDB ID    | Peptide sequence          | Peptide source/Uniport accession no. | Resolution (Å <sup>0</sup> ) | Gap Index (Å <sup>0</sup> ) | Interface area (Å <sup>02</sup> ) | Total Hydrogen bonds in pMHC |    |
| H2-Kb/8                           | 1KJ3      | KVITFIDL                  | Naturally processed                  | 2.3                          | 0.6                         | 905.3                             | 14                           |    |
|                                   | 1FO0      | INFDNTI                   | pBM1 peptide [Mouse]                 | 2.50                         | 0.9                         | 902.8                             | 18                           |    |
|                                   | 1VAC      | SIINFEKL                  | P01012                               | 2.5                          | 0.8                         | 876.9                             | 14                           |    |
|                                   | 1S7S      | ALYNFATM                  | P07399                               | 1.99                         | 0.8                         | 877.5                             | 10                           |    |
|                                   | 1S7T      | AVFNFATM                  | Lcmv-Peptide                         | 2.30                         | 0.8                         | 852.3                             | 11                           |    |
|                                   | 1G6R      | SIYRYYGL                  | Syr protein                          | 2.80                         | 1.2                         | 865.2                             | 13                           |    |
|                                   | 1N59      | AVYNFATM                  | P07399                               | 2.95                         | 0.9                         | 864.7                             | 9                            |    |
|                                   | 1LK2      | GNYSFYAL                  | Synthetic                            | 1.35                         | 1.1                         | 776.2                             | 15                           |    |
|                                   | 1OSZ      | RGYLYQGL                  | P11212                               | 2.1                          | 0.8                         | 909.5                             | 18                           |    |
|                                   | 1BQH      | RGYVYQGL                  | P11212                               | 2.80                         | 0.8                         | 882.6                             | 12                           |    |
|                                   | 1LEG      | EQYKFYSV                  | Q62425                               | 1.75                         | 0.9                         | 880.6                             | 15                           |    |
|                                   | H2-Db/9   | 1JUF                      | SSVIGVWYL                            | AAB81863                     | 2.0                         | 0.7                               | 865.1                        | 16 |
|                                   |           | 1INQ                      | SSVVGWVYL                            | AAB81863                     | 2.20                        | 0.6                               | 870.2                        | 16 |
|                                   |           | 1S7W                      | KALYNFATM                            | P07399                       | 2.40                        | 0.5                               | 993.0                        | 18 |
|                                   |           | 1S7X                      | KAVNFATM                             | P07399                       | 2.41                        | 0.5                               | 950.0                        | 18 |
| 1FFO                              |           | AAVYNFATM                 | P07399                               | 2.65                         | 0.6                         | 878.4                             | 17                           |    |
| 1BZ9                              |           | FAPGVFPYM                 | P04857                               | 2.8                          | 0.8                         | 1164.2                            | 10                           |    |
| 1FFN                              |           | KAVYNFATM                 | P07399                               | 2.70                         | 0.7                         | 946.8                             | 18                           |    |
| 1FFP                              |           | SAVYNFATM                 | SRC2066(IEDB)                        | 2.60                         | 0.4                         | 905.2                             | 21                           |    |
| 1JPG                              |           | FQPQNGQFI                 | M20869                               | 2.20                         | 0.7                         | 947.8                             | 19                           |    |
| 1FG2                              |           | KAVYNFATC                 | P07399                               | 2.75                         | 0.6                         | 928.4                             | 17                           |    |
| 1CE6                              |           | FAPGNYPAL                 | SV nucleoprotein                     | 2.90                         | 0.9                         | 867.7                             | 15                           |    |
| 1QLF                              |           | FAPSNYPAL                 | P04857                               | 2.65                         | 0.7                         | 879.5                             | 13                           |    |
| HLA-A*0201/9                      |           | 1QRN                      | LLFGYAVYV                            | Tax peptide P6A              | 2.8                         | 1.1                               | 871.5                        | 10 |
|                                   |           | 1AO7                      | LLFGYPVYV                            | Q82235                       | 2.6                         | 1.2                               | 883.3                        | 10 |
|                                   |           | 1QSF                      | LLFGYPVAV                            | Tax peptide                  | 2.80                        | 1.2                               | 828.6                        | 10 |
|                                   | 1HHI      | GILGFVFTL                 | Q66PA1                               | 2.5                          | 0.5                         | 842.0                             | 9                            |    |
|                                   | 1QEW      | FLWGPRALV                 | P43357                               | 2.20                         | 1                           | 843.2                             | 12                           |    |
|                                   | 1QSE      | LLFGYPRYV                 | Tax peptide                          | 2.80                         | 1.3                         | 873.0                             | 11                           |    |
|                                   | 1B0G      | ALWGFPPVL                 | Self peptide P1049]                  | 2.5                          | 0.5                         | 860.2                             | 12                           |    |
|                                   | 1I7T      | ALWGFPPVL                 | Self peptide P1049                   | 2.8                          | 0.7                         | 847.9                             | 9                            |    |
|                                   | 1I7U      | ALWGFPPVL                 | Self peptide [Human]                 | 1.8                          | 0.7                         | 845.2                             | 11                           |    |
|                                   | 1QR1      | IISAVVGIL                 | P04626                               | 2.4                          | 0.9                         | 827.1                             | 9                            |    |
|                                   | 1EEY      | ILSALVGIV                 | P04626                               | 2.25                         | 1.1                         | 787.1                             | 11                           |    |
|                                   | 1JHT      | ALGIGILTV                 | NP_005502                            | 2.15                         | 0.8                         | 781.0                             | 12                           |    |
|                                   | 1I7R      | FAPGFFPYL                 | P04857                               | 2.20                         | 0.9                         | 902.5                             | 11                           |    |
|                                   | 1I1F      | FLKEPVHGV                 | HIV- reverse transcriptase           | 2.80                         | 0.9                         | 850.9                             | 11                           |    |
|                                   | 1AKJ      | ILKEPVHGV                 | HIV-reverse transcriptase            | 2.65                         | 0.9                         | 857.2                             | 13                           |    |
| 1I1Y                              | YLKEPVHGV | HIV-reverse transcriptase | 2.20                                 | 0.9                          | 877.9                       | 13                                |                              |    |
| HLA-A*0201/10                     | 1HHG      | TLTSCNTSV                 | HIV-1 gp 120                         | 2.6                          | 1.4                         | 765.8                             | 12                           |    |
|                                   | 2CLR      | MLLSVPLLLG                | Calreticulin peptide                 | 2.0                          | 1.0                         | 896.5                             | 10                           |    |
|                                   | 1HHH      | FLPSDFPSPV                | HBV Nucleocapsid protein             | 3.0                          | 0.6                         | 918.4                             | 11                           |    |
|                                   | 1JF1      | ELAGIGILTV                | melan-A [Homo sapiens]               | 1.85                         | 0.6                         | 870.4                             | 11                           |    |
|                                   | 1I4F      | GVYDGREHTV                | P43358                               | 1.40                         | 1.1                         | 820.1                             | 15                           |    |

**Table 1:** MHC-peptide complexes used in the study.

| MHC Class I allele/peptide length | Peptide ID | Peptide sequence | Category        | Swiss Prot Accession no. | IC <sub>50</sub> (nM) |
|-----------------------------------|------------|------------------|-----------------|--------------------------|-----------------------|
| H2-Kb/8                           | 1          | NTVVFDAL         | SYNTHET<br>IC   | P23700                   | 155000                |
|                                   | 2          | DDEEYVIL         | SYNTHET<br>IC   | P31682                   | 124000                |
|                                   | 3          | QPQNYLRL         | SYNTHET<br>IC   | O86164                   | 51667                 |
|                                   | 4          | ANEGYDAL         | SYNTHET<br>IC   | P31681                   | 11923                 |
|                                   | 5          | IIFLLILL         | VIRAL           | P03140                   | 7500                  |
|                                   | 6          | MWYWGPSL         | VIRAL           | P03140                   | 7500                  |
|                                   | 7          | LMSGFRQM         | SYNTHET<br>IC   | Q9Z7H7                   | 6889                  |
|                                   | 8          | CLIFLLVL         | VIRAL           | P03140                   | 6000                  |
|                                   | 9          | FIIFLFIL         | VIRAL           | P03140                   | 5000                  |
| H2-Db/9                           | 1          | AEDTNVSLI        | SYNTHET<br>IC   | P23700                   | 440000                |
|                                   | 2          | GFKSNFNKI        | SYNTHET<br>IC   | Q9Z7H7                   | 440000                |
|                                   | 3          | QLPPNSLLI        | BACTERI<br>AL   | Q9Z7P3                   | 293333                |
|                                   | 4          | VENPGGYCL        | VIRAL           | P09991                   | 33500                 |
|                                   | 5          | TAGANPMDL        | SYNTHET<br>IC   | P31681                   | 22000                 |
|                                   | 6          | TGKLNLENL        | SYNTHET<br>IC   | Q9Z6X8                   | 17600                 |
|                                   | 7          | SGVENPGGY        | VIRAL           | P09991                   | 13155                 |
|                                   | 8          | KAVYNFATC        | VIRAL           | P09991                   | 5429                  |
|                                   | 9          | LLVFNYPGI        | SYNTHET<br>IC   | Q9Z6X9                   | 5167                  |
| HLA-A*0201/9                      | 1          | VVHFFKNIV        | SELF<br>PEPTIDE | P02686                   | 50000                 |
|                                   | 2          | KIFGSLAFL        | SELF<br>PEPTIDE | P04626                   | 27000                 |
|                                   | 3          | TLPRARRRV        | CANCER          | Q01726                   | 25000                 |
|                                   | 4          | SLLMWITQC        | SELF<br>PEPTIDE | P78358                   | 21070                 |
|                                   | 5          | FLFGSLAFL        | SELF<br>PEPTIDE | P04626                   | 19000                 |
|                                   | 6          | FLYAALLLA        | SELF<br>PEPTIDE | P06905                   | 17177                 |
|                                   | 7          | NGMLIMCNA        | CANCER          | Q01718                   | 16667                 |
|                                   | 8          | SLYITVAVL        | VIRAL           | P05889                   | 16667                 |
|                                   | 9          | RLCVQSTHV        | VIRAL           | P03129                   | 16666                 |
|                                   | 10         | FLFESLAFL        | SELF<br>PEPTIDE | P04626                   | 15000                 |
|                                   | 11         | HLSLRGLPV        | VIRAL           | P20977                   | 12500                 |
|                                   | 12         | ALVARAAVL        | CANCER          | Q01726                   | 11111                 |
|                                   | 13         | SLCFLGAIA        | CANCER          | Q01726                   | 10000                 |
|                                   | 14         | HLEGKVILV        | VIRAL           | P03368                   | 8333                  |
|                                   | 15         | VALVGLFVL        | SELF<br>PEPTIDE | P40126                   | 8333                  |
|                                   | 16         | RVMAPRALL        | CANCER          | P43355                   | 7667                  |
|                                   | 17         | VCMTVDSL         | SELF<br>PEPTIDE | P40126                   | 7143                  |
|                                   | 18         | ILLGIFFLC        | CANCER          | Q01726                   | 5556                  |
|                                   | 19         | KLPQLCTEL        | VIRAL           | P03126                   | 5556                  |

|               |    |            |                 |        |      |
|---------------|----|------------|-----------------|--------|------|
| HLA-A*0201/10 | 20 | ALGLVCVQM  | CANCER          | P43355 | 5000 |
|               | 21 | FLHLTLIVL  | CANCER          | Q01726 | 5000 |
|               | 22 | HLESLFTAV  | VIRAL           | P03156 | 5000 |
|               | 23 | LLGCAANWI  | VIRAL           | P12900 | 5000 |
|               | 1  | AAGIGILTVI | CANCER          | Q16655 | 5555 |
|               | 2  | ELCCQHLWQI | ALLERGE<br>N    | P04721 | 5555 |
|               | 3  | FLPRHRDTGI | SELF<br>PEPTIDE | P02686 | 5000 |

**Table 2:** MHC non binding peptide dataset used in the study.

| MHC Class I<br>allele/peptide<br>length | Nearest atom < 4.0 Å    |        |                         |       | C-beta < 7.0 Å          |        |                         |      |
|-----------------------------------------|-------------------------|--------|-------------------------|-------|-------------------------|--------|-------------------------|------|
|                                         | PDB<br>ID/Peptide<br>ID | MJ     | PDB<br>ID/Peptide<br>ID | BT    | PDB<br>ID/Peptide<br>ID | MJ     | PDB<br>ID/Peptide<br>ID | BT   |
| H2-Kb/8                                 | 5                       | -196.3 | 6                       | -6.4  | 5                       | -90.5  | 3                       | -0.2 |
|                                         | 9                       | -195.8 | 7                       | -6.3  | 9                       | -89.3  | 1FO0                    | -1.2 |
|                                         | 8                       | -187.2 | 1FO0                    | -5.5  | 8                       | -84.6  | 6                       | -1.2 |
|                                         | 1KJ3                    | -157.3 | 1S7S                    | -4.8  | 1FO0                    | -68.8  | 1OSZ                    | 0.0  |
|                                         | 1FO0                    | -157.0 | 1LEG                    | -4.8  | 6                       | -67.8  | 1BQH                    | 0.0  |
|                                         | 7                       | -154.9 | 5                       | -4.7  | 7                       | -66.2  | 7                       | 0.2  |
|                                         | 1VAC*                   | -154.8 | 9                       | -4.4  | 1KJ3                    | -65.7  | 2                       | 0.3  |
|                                         | 1S7S                    | -154.3 | 1KJ3                    | -4.3  | 1S7S                    | -65.2  | 1LK2                    | 0.5  |
|                                         | 1S7T                    | -153.6 | 1G6R                    | -4.2  | 1S7T                    | -65.1  | 1VAC*                   | 0.6  |
|                                         | 1G6R                    | -150.2 | 1N59                    | -4.2  | 1VAC*                   | -64.7  | 1S7S                    | 0.6  |
|                                         | 6                       | -149.2 | 1LK2                    | -4.2  | 1                       | -64.4  | 1S7T                    | 0.6  |
|                                         | 1N59                    | -147.5 | 1S7T                    | -4.0  | 1G6R                    | -64.3  | 4                       | 0.6  |
|                                         | 1                       | -146.0 | 1VAC*                   | -3.7  | 2                       | -63.0  | 1KJ3                    | 0.7  |
|                                         | 1LK2                    | -144.8 | 1OSZ                    | -3.7  | 1OSZ                    | -62.9  | 1N59                    | 0.8  |
|                                         | 1OSZ                    | -137.3 | 1BQH                    | -3.6  | 1N59                    | -62.4  | 1G6R                    | 0.9  |
|                                         | 2                       | -136.7 | 3                       | -3.4  | 1LK2                    | -62.2  | 1LEG                    | 0.9  |
|                                         | 1BQH                    | -135.4 | 8                       | -3.4  | 1BQH                    | -61.1  | 5                       | 0.9  |
|                                         | 1LEG                    | -133.4 | 1                       | -3.3  | 3                       | -57.2  | 1                       | 1.1  |
|                                         | 3                       | -131.7 | 4                       | -3.0  | 4                       | -56.7  | 8                       | 1.3  |
|                                         | 4                       | -127.8 | 2                       | -2.8  | 1LEG                    | -54.5  | 9                       | 1.3  |
| H2-Db/9                                 | 9                       | -166.6 | 1BZ9                    | -9.3  | 9                       | -101.2 | 1BZ9                    | -9.3 |
|                                         | 3                       | -158.1 | 1CE6                    | -7.1  | 3                       | -100.4 | 1S7W                    | -7.0 |
|                                         | 1BZ9                    | -155.6 | 1QLF                    | -7.0  | 1INQ*                   | -97.0  | 1FFN                    | -6.7 |
|                                         | 1JUF                    | -153.8 | 1S7W                    | -7.0  | 1S7W                    | -91.1  | 1FG2                    | -2.6 |
|                                         | 1JPG                    | -153.0 | 9                       | -7.0  | 1S7X                    | -90.1  | 8                       | -2.6 |
|                                         | 1INQ*                   | -151.5 | 4                       | -6.9  | 1FFO                    | -87.9  | 4                       | -2.6 |
|                                         | 1CE6                    | -148.6 | 1FFN                    | -6.7  | 1JUF                    | -87.8  | 1INQ*                   | -2.3 |
|                                         | 4                       | -148.6 | 1JPG                    | -6.5  | 1FFN                    | -87.1  | 1JUF                    | -2.1 |
|                                         | 1QLF                    | -148.1 | 1S7X                    | -6.2  | 1BZ9                    | -87.1  | 1CE6                    | -2.1 |
|                                         | 1                       | -140.2 | 3                       | -6.1  | 1FFP                    | -87.0  | 1JPG                    | -2.0 |
|                                         | 1FFO                    | -138.4 | 1FG2                    | -5.9  | 1FG2                    | -85.5  | 1S7X                    | -1.8 |
|                                         | 1S7X                    | -137.3 | 8                       | -5.9  | 8                       | -85.5  | 3                       | -1.8 |
|                                         | 1S7W                    | -135.6 | 1FFO                    | -5.4  | 4                       | -85.2  | 1QLF                    | -1.7 |
|                                         | 1FFP                    | -134.6 | 1INQ*                   | -5.2  | 1                       | -84.0  | 1FFO                    | -1.4 |
|                                         | 5                       | -134.5 | 1JUF                    | -5.2  | 1CE6                    | -83.4  | 1FFP                    | -1.2 |
|                                         | 6                       | -134.5 | 1FFP                    | -4.1  | 1JPG                    | -83.4  | 1                       | -1.2 |
|                                         | 1FFN                    | -132.6 | 1                       | -4.0  | 1QLF                    | -82.7  | 9                       | -1.0 |
|                                         | 1FG2                    | -128.6 | 5                       | -3.9  | 6                       | -81.4  | 2                       | -0.8 |
|                                         | 8                       | -128.6 | 7                       | -3.3  | 2                       | -80.0  | 6                       | -0.7 |
|                                         | 2                       | -128.1 | 2                       | -2.5  | 5                       | -79.8  | 7                       | -0.5 |
| 7                                       | -117.6                  | 6      | -2.5                    | 7     | -73.6                   | 5      | 0.7                     |      |
| HLA-                                    | 18                      | -209.2 | 1AO7                    | -10.6 | 18                      | -110.7 | 16                      | -7.4 |

|          |               |        |        |       |       |        |        |       |      |
|----------|---------------|--------|--------|-------|-------|--------|--------|-------|------|
| A*0201/9 | 10            | -201.6 | 1QRN   | -10.3 | 21    | -108.0 | 14     | -4.4  |      |
|          | 5             | -200.9 | 6      | -9.9  | 10    | -107.8 | 6      | -3.7  |      |
|          | 21            | -200.2 | 1QEW   | -9.8  | 5     | -107.1 | 10     | -3.6  |      |
|          | 1QRN          | -195.7 | 18     | -9.7  | 6     | -104.4 | 1QRN   | -3.5  |      |
|          | 1AO7          | -195.1 | 1QSF   | -9.6  | 2     | -100.0 | 1AO7   | -3.5  |      |
|          | 6             | -193.9 | 10     | -9.6  | 15    | -99.0  | 18     | -3.5  |      |
|          | 15            | -192.0 | 1B0G   | -9.4  | 1B0G  | -98.8  | 1QSF   | -3.3  |      |
|          | 1QSF          | -190.6 | 1I7T   | -9.2  | 14    | -98.7  | 2      | -3.0  |      |
|          | 1HHI*         | -190.1 | 1I7U   | -9.1  | 1QRN  | -97.9  | 21     | -3.0  |      |
|          | 1QEW          | -184.1 | 1QSE   | -8.9  | 1HHI* | -97.9  | 1QEW   | -2.8  |      |
|          | 1QSE          | -182.5 | 1I7R   | -8.7  | 1I7T  | -97.8  | 1B0G   | -2.8  |      |
|          | 1B0G          | -181.1 | 5      | -8.6  | 1AO7  | -96.7  | 22     | -2.7  |      |
|          | 2             | -179.7 | 21     | -8.5  | 1I7U  | -96.1  | 1I7T   | -2.6  |      |
|          | 1I7T          | -179.3 | 14     | -8.2  | 1QR1  | -95.9  | 5      | -2.6  |      |
|          | 1I7U          | -179.1 | 2      | -7.3  | 8     | -95.8  | 11     | -2.6  |      |
|          | 1QR1          | -177.4 | 19     | -7.3  | 1EEY  | -95.2  | 1I7U   | -2.5  |      |
|          | 14            | -176.3 | 15     | -7.1  | 1QEW  | -94.5  | 1I1Y   | -2.4  |      |
|          | 1EEY          | -174.5 | 1HHI*  | -6.9  | 1QSF  | -93.7  | 1HHI*  | -2.3  |      |
|          | 12            | -173.1 | 22     | -6.7  | 1JHT  | -93.4  | 8      | -2.3  |      |
|          | 8             | -172.5 | 1I1F   | -6.3  | 12    | -91.6  | 1JHT   | -2.2  |      |
|          | 23            | -171.3 | 20     | -6.1  | 1QSE  | -90.2  | 1I7R   | -2.1  |      |
|          | 16            | -170.2 | 11     | -5.8  | 16    | -89.4  | 1I1F   | -2.1  |      |
|          | 1JHT          | -169.8 | 1I1Y   | -5.5  | 23    | -89.3  | 15     | -2.1  |      |
|          | 17            | -168.0 | 12     | -5.5  | 20    | -88.9  | 20     | -2.1  |      |
|          | 1I7R          | -167.9 | 1AKJ   | -5.4  | 22    | -88.5  | 1AKJ   | -2.0  |      |
|          | 11            | -165.9 | 8      | -5.3  | 1I7R  | -87.5  | 19     | -1.9  |      |
|          | 20            | -165.7 | 17     | -5.1  | 4     | -87.2  | 1QSE   | -1.8  |      |
|          | 1             | -163.5 | 23     | -5.0  | 13    | -87.2  | 12     | -1.8  |      |
|          | 4             | -162.3 | 9      | -4.7  | 11    | -87.1  | 1EEY   | -1.1  |      |
|          | 1I1F          | -161.3 | 1JHT   | -4.5  | 1I1F  | -85.6  | 9      | -1.1  |      |
|          | 13            | -159.9 | 1EEY   | -4.3  | 1AKJ  | -85.0  | 13     | -1.0  |      |
|          | 22            | -159.0 | 1QR1   | -4.1  | 17    | -84.8  | 7      | -0.9  |      |
|          | 1AKJ          | -158.8 | 1      | -4.0  | 1     | -83.9  | 1QR1   | -0.7  |      |
|          | 19            | -155.6 | 3      | -3.8  | 19    | -83.5  | 4      | -0.6  |      |
|          | 9             | -154.5 | 7      | -3.4  | 1I1Y  | -83.4  | 3      | -0.5  |      |
|          | 1I1Y          | -152.9 | 13     | -3.4  | 9     | -81.1  | 23     | -0.5  |      |
|          | 1HHG          | -146.1 | 4      | -3.3  | 1HHG  | -76.1  | 17     | -0.1  |      |
|          | 7             | -143.0 | 16     | -2.5  | 3     | -74.4  | 1HHG   | -0.0  |      |
|          | 3             | -142.7 | 1HHG   | -2.4  | 7     | -74.3  | 1      | 0.3   |      |
|          | HLA-A*0201/10 | 2CLR   | -176.8 | 3     | -7.8  | 2CLR   | -121.8 | 2CLR  | -4.0 |
|          |               | 1HHH   | -158.6 | 2CLR  | -7.3  | 1JF1   | -108.0 | 1HHH  | -2.6 |
|          |               | 2      | -157.0 | 1HHH  | -6.7  | 2      | -107.9 | 1JF1  | -2.4 |
|          |               | 3      | -155.7 | 2     | -5.6  | 1HHH   | -102.2 | 2     | -1.9 |
|          |               | 1JF1   | -148.9 | 1I4F* | -4.6  | 1      | -101.7 | 3     | -1.6 |
|          |               | 1      | -145.9 | 1JF1  | -4.4  | 3      | -95.8  | 1I4F* | -1.5 |
|          | 1I4F*         | -135.0 | 1      | -1.9  | 1I4F* | -87.9  | 1      | -0.0  |      |

**Table 3 :** Ranking of MHC binding and non peptides according to their predicted binding affinity by threading using a scoring matrix (MJ & BT) and two distance criteria (Nearest atom < 4.0 Å & C-beta < 7.0 Å). \* Structure used as template.

| MHC Class I<br>allele/peptide<br>length | Nearest atom < 4.0 Å <sup>0</sup> |    |                   |    | C-beta < 7.0 Å <sup>0</sup> |    |                   |    |
|-----------------------------------------|-----------------------------------|----|-------------------|----|-----------------------------|----|-------------------|----|
|                                         | PDB<br>ID/Peptide                 | MJ | PDB<br>ID/Peptide | BT | PDB<br>ID/Peptide           | MJ | PDB<br>ID/Peptide | BT |

|              | ID    |        | ID     |       | ID    |       | ID    |       |      |
|--------------|-------|--------|--------|-------|-------|-------|-------|-------|------|
| H2-Kb/8      | 9     | -185.0 | 1LEG*  | -5.5  | 5     | -     | 6     | -2.1  |      |
|              |       |        |        |       |       | 105.3 |       |       |      |
|              |       | 5      | -184.0 | 6     | -6.8  | 9     | -     | 1FO0  | -1.9 |
|              |       |        |        |       |       |       | 104.4 |       |      |
|              |       | 8      | -175.1 | 1FO0  | -4.8  | 8     | -     | 1VAC  | -0.6 |
|              |       |        |        |       |       |       | 100.1 |       |      |
|              |       | 1FO0   | -151.6 | 2     | -4.0  | 1S7S  | -81.0 | 1S7S  | -0.6 |
|              |       | 7      | -145.6 | 1S7S  | -3.6  | 1VAC  | -79.9 | 1S7T  | -0.5 |
|              |       | 1VAC   | -145.5 | 1LK2  | -3.5  | 1KJ3  | -79.3 | 3     | -0.5 |
|              |       | 1KJ3   | -144.9 | 1OSZ  | -3.5  | 1FO0  | -79.1 | 1N59  | -0.3 |
|              |       | 1S7T   | -144.8 | 3     | -3.5  | 1S7T  | -79.0 | 2     | -0.2 |
|              |       | 1S7S   | -144.0 | 1BQH  | -3.4  | 7     | -79.0 | 4     | -0.2 |
|              |       | 6      | -142.2 | 7     | -3.3  | 6     | -78.8 | 1KJ3  | -0.1 |
|              |       | 1N59   | -137.3 | 1N59  | -3.0  | 1G6R  | -77.2 | 1LK2  | -0.1 |
|              |       | 1G6R   | -136.3 | 9     | -2.5  | 1N59  | -76.3 | 1     | -0.1 |
|              |       | 1      | -133.9 | 1G6R  | -2.4  | 1     | -75.7 | 5     | -0.0 |
|              |       | 1LK2   | -131.6 | 4     | -2.4  | 1LK2  | -72.4 | 1OSZ  | 0.1  |
|              |       | 1OSZ   | -127.2 | 1KJ3  | -2.2  | 2     | -71.8 | 1BQH  | 0.1  |
|              |       | 1BQH   | -124.5 | 1VAC  | -2.2  | 1OSZ  | -71.5 | 1LEG* | 0.2  |
|              |       | 1LEG*  | -123.9 | 5     | -2.1  | 1BQH  | -69.7 | 7     | 0.2  |
|              | 3     | -117.8 | 1S7T   | -1.7  | 3     | -65.9 | 9     | 0.2   |      |
|              | 2     | -116.9 | 1      | -1.7  | 4     | -65.9 | 8     | 0.3   |      |
|              | 4     | -112.6 | 8      | -0.8  | 1LEG* | -64.9 | 1G6R  | 0.5   |      |
| H2-Db/9      | 9     | -190.3 | 1BZ9   | -8.7  | 3     | -     | 1S7W  | -3.5  |      |
|              |       |        |        |       |       | 112.8 |       |       |      |
|              |       | 3      | -177.7 | 1S7W  | -7.6  | 9     | -     | 1FFN  | -3.2 |
|              |       |        |        |       |       |       | 109.9 |       |      |
|              |       | 1BZ9   | -177.5 | 1FFN  | -7.2  | 1JUF  | -     | 1BZ9  | -3.1 |
|              |       |        |        |       |       |       | 102.6 |       |      |
|              |       | 1JUF   | -167.9 | 1S7X  | -6.5  | 1INQ  | -     | 1FG2  | -2.9 |
|              |       |        |        |       |       |       | 101.5 |       |      |
|              |       | 1INQ   | -166.2 | 8     | -6.0  | 1BZ9  | -96.6 | 8     | -2.9 |
|              |       | 1JPG*  | -165.7 | 4     | -5.4  | 1FFN  | -96.6 | 4     | -2.6 |
|              |       | 1CE6   | -165.3 | 3     | -5.2  | 1S7W  | -95.3 | 1S7X  | -2.5 |
|              |       | 1QLF   | -165.0 | 9     | -5.2  | 1S7X  | -94.2 | 3     | -2.4 |
|              |       | 4      | -160.8 | 1FFO  | -4.1  | 1FFO  | -93.1 | 1CE6  | -2.3 |
|              |       | 2      | -156.3 | 1JUF  | -4.0  | 2     | -93.1 | 1QLF  | -2.3 |
|              |       | 1S7W   | -156.0 | 1INQ  | -4.0  | 1JPG* | -93.0 | 1JUF  | -2.2 |
|              |       | 1FFO   | -156.0 | 1FFP  | -3.7  | 4     | -92.5 | 1INQ  | -2.2 |
|              |       | 1S7X   | -155.2 | 1     | -3.6  | 1FFP  | -92.3 | 1JPG* | -2.2 |
|              |       | 1      | -153.4 | 6     | -3.3  | 1CE6  | -91.6 | 1FFO  | -2.0 |
|              |       | 1FFP   | -153.2 | 2     | -3.2  | 1QLF  | -91.3 | 1FFP  | -1.9 |
|              |       | 1FFN   | -152.0 | 7     | -3.0  | 1     | -90.6 | 9     | -1.9 |
|              | 6     | -151.4 | 1FG2   | -2.9  | 1FG2  | -90.0 | 2     | -1.6  |      |
|              | 5     | -149.1 | 5      | -2.7  | 8     | -90.0 | 1     | -1.3  |      |
|              | 1FG2  | -147.3 | 1CE6   | -2.3  | 5     | -88.1 | 6     | -1.1  |      |
|              | 8     | -147.3 | 1QLF   | -2.3  | 6     | -87.6 | 7     | -1.0  |      |
|              | 7     | -133.9 | 1JPG*  | 0.1   | 7     | -79.1 | 5     | -0.0  |      |
| HLA-A*0201/9 | 5     | -191.5 | 1QRN   | -10.1 | 18    | -     | 10    | -4.7  |      |
|              |       |        |        |       |       | 113.5 |       |       |      |
|              |       | 10     | -191.5 | 1AO7* | -10.1 | 21    | -     | 1QRN  | -4.6 |
|              |       |        |        |       |       |       | 110.4 |       |      |
|              |       | 18     | -188.1 | 1QEW  | -9.8  | 10    | -     | 1AO7* | -4.6 |
|              |       |        |        |       |       |       | 108.6 |       |      |
|              | 1QRN  | -181.4 | 5      | -9.4  | 5     | -     | 18    | -4.5  |      |
|              |       |        |        |       |       | 107.9 |       |       |      |
|              | 1AO7* | -181.0 | 10     | -9.4  | 6     | -     | 1QSF  | -4.3  |      |

|           |       |        |        |      |       |       |       |      |
|-----------|-------|--------|--------|------|-------|-------|-------|------|
|           | 21    | -179.3 | 6      | -9.2 | 15    | 106.5 |       |      |
|           |       |        |        |      |       | -     | 6     | -4.0 |
|           | 1QEW  | -177.2 | 1QSE   | -9.0 | 1HHI  | 104.0 |       |      |
|           |       |        |        |      |       | -     | 21    | -3.9 |
|           |       |        |        |      |       | 101.2 |       |      |
|           | 6     | -176.3 | 2      | -8.8 | 2     | -     | 5     | -3.7 |
|           |       |        |        |      |       | 100.0 |       |      |
|           | 1QSF  | -175.5 | 1QSF   | -8.7 | 1QRN  | -99.9 | 14    | -3.7 |
|           | 1QSE  | -175.2 | 16     | -8.1 | 14    | -99.4 | 1HHI  | -3.6 |
|           | 15    | -166.4 | 1B0G   | -8.0 | 1B0G  | -99.0 | 1B0G  | -3.6 |
|           | 1QR1  | -166.2 | 1I7U   | -8.0 | 1AO7* | -98.6 | 1QEW  | -3.5 |
|           | 2     | -164.7 | 18     | -8.0 | 1I7T  | -98.0 | 1I7T  | -3.4 |
|           | 1B0G  | -164.2 | 21     | -7.9 | 1QR1  | -96.3 | 1I1F  | -3.4 |
|           | 23    | -164.0 | 1I7T   | -7.8 | 1I7U  | -96.2 | 1I7U  | -3.3 |
|           | 1EEY  | -163.7 | 14     | -7.5 | 1JHT  | -95.9 | 15    | -3.3 |
|           | 1I7U  | -163.4 | 19     | -7.1 | 1QSF  | -95.6 | 1AKJ  | -3.2 |
|           | 1I7T  | -163.2 | 1I7R   | -7.0 | 8     | -95.6 | 1I7R  | -3.1 |
|           | 1HHI  | -162.5 | 12     | -6.3 | 1EEY  | -95.2 | 1I1Y  | -3.1 |
|           | 12    | -160.8 | 8      | -6.2 | 1QEW  | -94.9 | 1JHT  | -2.9 |
|           | 17    | -157.6 | 23     | -6.1 | 12    | -92.3 | 2     | -2.9 |
|           | 16    | -157.4 | 9      | -6.0 | 1QSE  | -90.7 | 1QSE  | -2.8 |
|           | 14    | -157.3 | 1I1F   | -5.9 | 20    | -90.5 | 20    | -2.8 |
|           | 8     | -156.5 | 1I1Y   | -5.8 | 16    | -90.2 | 12    | -2.7 |
|           | 1I7R  | -152.1 | 1HHI   | -5.7 | 1I7R  | -89.9 | 16    | -2.7 |
|           | 1     | -151.6 | 11     | -5.7 | 23    | -89.2 | 11    | -2.6 |
|           | 1I1F  | -150.2 | 15     | -5.6 | 11    | -88.9 | 8     | -2.4 |
|           | 1AKJ  | -147.3 | 22     | -5.3 | 13    | -87.7 | 22    | -2.0 |
|           | 4     | -145.5 | 1AKJ   | -5.0 | 4     | -87.6 | 7     | -1.9 |
|           | 13    | -145.4 | 20     | -4.9 | 22    | -87.4 | 13    | -1.7 |
|           | 1JHT  | -144.4 | 3      | -4.8 | 1I1F  | -86.7 | 19    | -1.7 |
|           | 11    | -142.3 | 1EEY   | -4.4 | 17    | -86.4 | 1EEY  | -1.6 |
|           | 20    | -141.8 | 1JHT   | -4.4 | 1AKJ  | -86.1 | 4     | -1.4 |
|           | 9     | -141.7 | 13     | -4.4 | 1     | -85.1 | 1QR1  | -1.3 |
|           | 22    | -141.1 | 17     | -4.4 | 1I1Y  | -83.9 | 3     | -1.1 |
|           | 1I1Y  | -139.9 | 4      | -4.1 | 19    | -82.8 | 17    | -1.1 |
|           | 19    | -136.5 | 1QR1   | -4.0 | 9     | -80.5 | 23    | -1.1 |
|           | 1HHG  | -132.5 | 1      | -3.9 | 7     | -78.1 | 9     | -1.0 |
|           | 3     | -131.6 | 1HHG   | -2.6 | 1HHG  | -75.7 | 1     | -0.6 |
|           | 7     | -117.7 | 7      | -2.4 | 3     | -74.4 | 1HHG  | -0.1 |
| HLA-      | 2CLR* | -191.1 | 2CLR * | -9.7 | 1     | -83.4 | 2CLR* | -4.3 |
| A*0201/10 | 1HHH  | -159.1 | 1HHH   | -8.0 | 1HHH  | -84.0 | 1JF1  | -2.7 |
|           | 2     | -151.9 | 2      | -7.0 | 1I4F  | -75.6 | 2     | -1.7 |
|           | 3     | -150.7 | 3      | -5.4 | 1JF1  | -95.2 | 1HHH  | -1.5 |
|           | 1JF1  | -150.1 | 1JF1   | -4.9 | 2     | -89.1 | 1I4F  | -1.0 |
|           | 1     | -138.9 | 1I4F   | -4.2 | 2CLR* | -     | 1     | -0.6 |
|           |       |        |        |      |       | 106.6 |       |      |
|           | 1I4F  | -129.4 | 1      | -3.0 | 3     | -83.2 | 3     | -0.5 |

**Table 4:** Ranking of MHC binding and non binding peptides according to their predicted binding affinity by threading using a scoring matrix (MJ & BT) and two distance criteria (Nearest atom < 4.0 Å<sup>0</sup> & C-beta < 7.0 Å<sup>0</sup>). \* Structure used as template.

| MHC Class I<br>allele/peptide<br>length | Nearest atom < 4.0 Å <sup>0</sup> |    |                         |    | C-beta < 7.0 Å <sup>0</sup> |    |                         |    |
|-----------------------------------------|-----------------------------------|----|-------------------------|----|-----------------------------|----|-------------------------|----|
|                                         | PDB<br>ID/Peptide<br>ID           | MJ | PDB<br>ID/Peptide<br>ID | BT | PDB<br>ID/Peptide<br>ID     | MJ | PDB<br>ID/Peptide<br>ID | BT |

|              |         |         |         |       |        |        |         |       |       |
|--------------|---------|---------|---------|-------|--------|--------|---------|-------|-------|
| H2-Kb/8      | 5       | -196.3  | 6       | -6.60 | 5      | -97.90 | 6       | -1.65 |       |
|              | 9       | -195.8  | 1LEG*   | -5.15 | 9      | -96.85 | 1FO0    | -1.55 |       |
|              | 8       | -187.2  | 1FO0    | -5.15 | 8      | -92.35 | 3       | -0.35 |       |
|              | 1KJ3    | -157.3  | 7       | -4.80 | 1FO0   | -73.95 | 1VAC*   | 0.0   |       |
|              | 1FO0    | -157.0  | 1S7S    | -4.20 | 6      | -73.30 | 1S7S    | 0.0   |       |
|              | 7       | -154.9  | 1LK2    | -3.85 | 1S7S   | -73.10 | 1S7T    | 0.05  |       |
|              | 1VAC*   | -154.8  | 1OSZ    | -3.60 | 7      | -72.60 | 2       | 0.05  |       |
|              | 1S7S    | -154.3  | 1N59    | -3.60 | 1KJ3   | -72.50 | 1OSZ    | 0.05  |       |
|              | 1S7T    | -153.6  | 1BQH    | -3.50 | 1VAC*  | -72.30 | 1BQH    | 0.05  |       |
|              | 1G6R    | -150.2  | 3       | -3.45 | 1S7T   | -72.05 | 4       | 0.20  |       |
|              | 6       | -149.2  | 9       | -3.45 | 1G6R   | -70.75 | 1LK2    | 0.20  |       |
|              | 1N59    | -147.5  | 2       | -3.40 | 1      | -70.05 | 7       | 0.20  |       |
|              | 1       | -146.0  | 5       | -3.40 | 1N59   | -69.35 | 1N59    | 0.25  |       |
|              | 1LK2    | -144.8  | 1G6R    | -3.30 | 2      | -67.40 | 1KJ3    | 0.30  |       |
|              | 1OSZ    | -137.3  | 1KJ3    | -3.25 | 1LK2   | -67.30 | 5       | 0.45  |       |
|              | 2       | -136.7  | 1VAC*   | -2.95 | 1OSZ   | -67.20 | 1       | 0.50  |       |
|              | 1BQH    | -135.4  | 1S7T    | -2.85 | 1BQH   | -65.40 | 1LEG*   | 0.55  |       |
|              | 1LEG*   | -133.4  | 4       | -2.70 | 3      | -61.55 | 1G6R    | 0.70  |       |
|              | 3       | -131.7  | 1       | -2.50 | 4      | -61.30 | 9       | 0.75  |       |
|              | 4       | -127.8  | 8       | -2.10 | 1LEG*  | -59.70 | 8       | 0.80  |       |
|              | H2-Db/9 | 9       | -178.45 | 1BZ9  | -9     | 3      | -106.6  | 1BZ9  | -6.2  |
|              |         | 3       | -167.9  | 1S7W  | -7.3   | 9      | -105.55 | 1S7W  | -5.25 |
|              |         | 1BZ9    | -166.55 | 1FFN  | -6.95  | 1INQ*  | -99.25  | 1FFN  | -4.95 |
|              |         | 1JUF    | -160.85 | 1S7X  | -6.35  | 1JUF   | -95.2   | 1FG2  | -2.75 |
|              |         | 1JPG*   | -159.35 | 4     | -6.15  | 1S7W   | -93.2   | 8     | -2.75 |
|              |         | 1INQ*   | -158.85 | 9     | -6.1   | 1S7X   | -92.15  | 4     | -2.6  |
|              |         | 1CE6    | -156.95 | 8     | -5.95  | 1BZ9   | -91.85  | 1INQ* | -2.25 |
|              |         | 1QLF    | -156.55 | 3     | -5.65  | 1FFN   | -91.85  | 1CE6  | -2.2  |
|              |         | 4       | -154.7  | 1FFO  | -4.75  | 1FFO   | -90.5   | 1S7X  | -2.15 |
|              |         | 1FFO    | -147.2  | 1CE6  | -4.7   | 1FFP   | -89.65  | 1JUF  | -2.15 |
|              |         | 1       | -146.8  | 1QLF  | -4.65  | 4      | -88.85  | 3     | -2.1  |
|              |         | 1S7X    | -146.25 | 1JUF  | -4.6   | 1JPG*  | -88.2   | 1JPG* | -2.1  |
|              |         | 1S7W    | -145.8  | 1INQ* | -4.6   | 1FG2   | -87.75  | 1QLF  | -2    |
|              |         | 1FFP    | -143.9  | 1FG2  | -4.4   | 8      | -87.75  | 1FFO  | -1.7  |
| 6            |         | -142.95 | 1FFP    | -3.9  | 1CE6   | -87.5  | 1FFP    | -1.55 |       |
| 1FFN         |         | -142.3  | 1       | -3.8  | 1      | -87.3  | 9       | -1.45 |       |
| 2            |         | -142.2  | 5       | -3.3  | 1QLF   | -87    | 1       | -1.25 |       |
| 5            |         | -141.8  | 1JPG*   | -3.2  | 2      | -86.55 | 2       | -1.2  |       |
| 1FG2         |         | -137.95 | 7       | -3.15 | 6      | -84.5  | 6       | -0.9  |       |
| 8            |         | -137.95 | 6       | -2.9  | 5      | -83.95 | 7       | -0.75 |       |
| 7            |         | -125.75 | 2       | -2.85 | 7      | -76.35 | 5       | 0.35  |       |
| HLA-A*0201/9 |         | 18      | -198.65 | 1AO7* | -10.35 | 18     | -112.1  | 16    | -5.05 |
|              |         | 10      | -196.55 | 1QRN  | -10.2  | 21     | -109.2  | 10    | -4.15 |
|              |         | 5       | -196.2  | 1QEW  | -9.8   | 10     | -108.2  | 1QRN  | -4.05 |
|              |         | 21      | -189.75 | 6     | -9.55  | 5      | -107.5  | 1AO7* | -4.05 |
|              |         | 1QRN    | -188.55 | 10    | -9.5   | 6      | -105.45 | 14    | -4.05 |
|              |         | 1AO7*   | -188.05 | 1QSF  | -9.15  | 15     | -101.5  | 18    | -4    |
|              |         | 6       | -185.1  | 5     | -9     | 2      | -100    | 6     | -3.85 |
|              |         | 1QSF    | -183.05 | 1QSE  | -8.95  | 1HHI*  | -99.55  | 1QSF  | -3.8  |
|              |         | 1QEW    | -180.65 | 18    | -8.85  | 14     | -99.05  | 21    | -3.45 |
|              |         | 15      | -179.2  | 1B0G  | -8.7   | 1QRN   | -98.9   | 1B0G  | -3.2  |
|              |         | 1QSE    | -178.85 | 1I7U  | -8.55  | 1B0G   | -98.9   | 5     | -3.15 |
|              |         | 1HHI*   | -176.3  | 1I7T  | -8.5   | 1I7T   | -97.9   | 1QEW  | -3.15 |
|              |         | 1B0G    | -172.65 | 21    | -8.2   | 1AO7*  | -97.65  | 1I7T  | -3    |
|              | 2       | -172.2  | 2       | -8.05 | 1I7U   | -96.15 | 1HHI*   | -2.95 |       |
|              | 1QR1    | -171.8  | 14      | -7.85 | 1QR1   | -96.1  | 2       | -2.95 |       |
|              | 1I7U    | -171.25 | 1I7R    | -7.85 | 8      | -95.7  | 1I7U    | -2.9  |       |
|              | 1I7T    | -171.25 | 19      | -7.2  | 1EEY   | -95.2  | 1I1F    | -2.75 |       |

|               |         |         |       |       |        |        |       |       |
|---------------|---------|---------|-------|-------|--------|--------|-------|-------|
| 1EEY          | -169.1  | 15      | -6.35 | 1QEW  | -94.7  | 111Y   | -2.75 |       |
| 23            | -167.65 | 1HHI*   | -6.3  | 1JHT  | -94.65 | 15     | -2.7  |       |
| 12            | -166.95 | 111F    | -6.1  | 1QSF  | -94.65 | 1AKJ   | -2.6  |       |
| 14            | -166.8  | 22      | -6    | 12    | -91.95 | 117R   | -2.6  |       |
| 8             | -164.5  | 12      | -5.9  | 1QSE  | -90.45 | 11     | -2.6  |       |
| 16            | -163.8  | 8       | -5.75 | 16    | -89.8  | 1JHT   | -2.55 |       |
| 17            | -162.8  | 11      | -5.75 | 20    | -89.7  | 20     | -2.45 |       |
| 117R          | -160    | 111Y    | -5.65 | 23    | -89.25 | 8      | -2.35 |       |
| 1             | -157.55 | 23      | -5.55 | 117R  | -88.7  | 22     | -2.35 |       |
| 1JHT          | -157.1  | 20      | -5.5  | 11    | -88    | 1QSE   | -2.3  |       |
| 111F          | -155.75 | 9       | -5.35 | 22    | -87.95 | 12     | -2.25 |       |
| 11            | -154.1  | 16      | -5.3  | 13    | -87.45 | 19     | -1.8  |       |
| 4             | -153.9  | 1AKJ    | -5.2  | 4     | -87.4  | 7      | -1.4  |       |
| 20            | -153.75 | 17      | -4.75 | 111F  | -86.15 | 13     | -1.35 |       |
| 1AKJ          | -153.05 | 1JHT    | -4.45 | 17    | -85.6  | 1EEY   | -1.35 |       |
| 13            | -152.65 | 1EEY    | -4.35 | 1AKJ  | -85.55 | 9      | -1.05 |       |
| 22            | -150.05 | 3       | -4.3  | 1     | -84.5  | 4      | -1    |       |
| 9             | -148.1  | 1QR1    | -4.05 | 111Y  | -83.65 | 1QR1   | -1    |       |
| 111Y          | -146.4  | 1       | -3.95 | 19    | -83.15 | 3      | -0.8  |       |
| 19            | -146.05 | 13      | -3.9  | 9     | -80.8  | 23     | -0.8  |       |
| 1HHG          | -139.3  | 4       | -3.7  | 7     | -76.2  | 17     | -0.6  |       |
| 3             | -137.15 | 7       | -2.9  | 1HHG  | -75.9  | 1      | -0.15 |       |
| 7             | -130.35 | 1HHG    | -2.5  | 3     | -74.4  | 1HHG   | -0.05 |       |
| HLA-A*0201/10 | 2CLR*   | -183.95 | 2CLR* | -8.5  | 2CLR*  | -121.8 | 2CLR* | -4.15 |
|               | 1HHH    | -158.85 | 1HHH  | -7.35 | 1JF1   | -108   | 1JF1  | -2.55 |
|               | 2       | -154.45 | 3     | -6.6  | 2      | -107.9 | 1HHH  | -2.05 |
|               | 3       | -153.2  | 2     | -6.3  | 1HHH   | -102.2 | 2     | -1.8  |
|               | 1JF1    | -149.5  | 1JF1  | -4.65 | 1      | -101.7 | 114F* | -1.25 |
|               | 1       | -142.4  | 114F* | -4.4  | 3      | -95.8  | 3     | -1.05 |
|               | 114F*   | -132.2  | 1     | -2.45 | 114F*  | -87.9  | 1     | -0.3  |

**Table 5 :** Ranking of MHC binding and non binding peptides according to their average predicted binding affinity by threading using a scoring matrix (MJ & BT) and two distance criteria (Nearest atom < 4.0 Å<sup>0</sup> & C-beta < 7.0 Å<sup>0</sup>). \* Structure used as template.

| MHC Class I allele/peptide length | Nearest atom < 4.0 Å <sup>0</sup> |     |        |     | C-beta < 7.0 Å <sup>0</sup> (Rank) |     |        |     |
|-----------------------------------|-----------------------------------|-----|--------|-----|------------------------------------|-----|--------|-----|
|                                   | PDB ID                            | MJ  | PDB ID | BT  | PDB ID                             | MJ  | PDB ID | BT  |
| H2-Kb/8                           | 1VAC                              | 13  | 1LEG   | 4   | 1LEG                               | 42  | 1LEG   | 40  |
|                                   | 1LEG                              | 29  | 1BQH   | 59  | 1VAC                               | 66  | 1BQH   | 126 |
|                                   | 1BQH                              | 96  | 1VAC   | 87  | 1BQH                               | 92  | 1VAC   | 165 |
| H2-Db/9                           | 1INQ                              | 17  | 1INQ   | 31  | 1INQ                               | 6   | 1INQ   | 19  |
|                                   | 1JPG                              | 79  | 1JPG   | 143 | 1JPG                               | 135 | 1JPG   | 89  |
| HLA-A*0201/9                      | 1AO7                              | 1   | 1AO7   | 1   | 1HHI                               | 1   | 1AO7   | 4   |
|                                   | 1HHI                              | 1   | 1QEW   | 5   | 1QEW                               | 6   | 1QEW   | 22  |
|                                   | 1QEW                              | 2   | 1HHI   | 22  | 1AO7                               | 8   | 1HHI   | 35  |
|                                   | 1QR1                              | 5   | 1QR1   | 430 | 1QR1                               | 14  | 1QR1   | 325 |
| HLA-A*0201/10                     | 114F                              | 104 | 114F   | 105 | 114F                               | 147 | 114F   | 142 |

**Table 6 :** Ranking of MHC binding peptides according to their predicted binding affinity by threading using own template in their source protein sequence for scoring matrices (MJ & BT) and two distance criteria (Nearest atom < 4.0 Å<sup>0</sup> & C-beta < 7.0 Å<sup>0</sup>).
